# Supplementary material for: Heterovalent substitution in anionic and cationic positions of PbS thin-films grown by SILAR method vis-à-vis Fermi energy measured through scanning tunneling spectroscopy
Source: Royal Society of Chemistry journal article supplement (doi:10.1039/c5tc03959b), 2015-12-09
Supplement: c5tc03959b1.pdf [file c5tc03959b1.pdf]

## Electronic supplementary information

Heterovalent substitution in anionic and cationic positions of PbS thin-films grown by SILAR method vis-à-vis Fermi energy measured through scanning tunneling spectroscopy

Hrishikesh Bhunia, Biswajit Kundu, Soumyo Chatterjee, and Amlan J. Pal\*

*Department of Solid State Physics, Indian Association for the Cultivation of Science,  
Jadavpur, Kolkata 700032, India*

E-mail: sspajp@iacs.res.in.

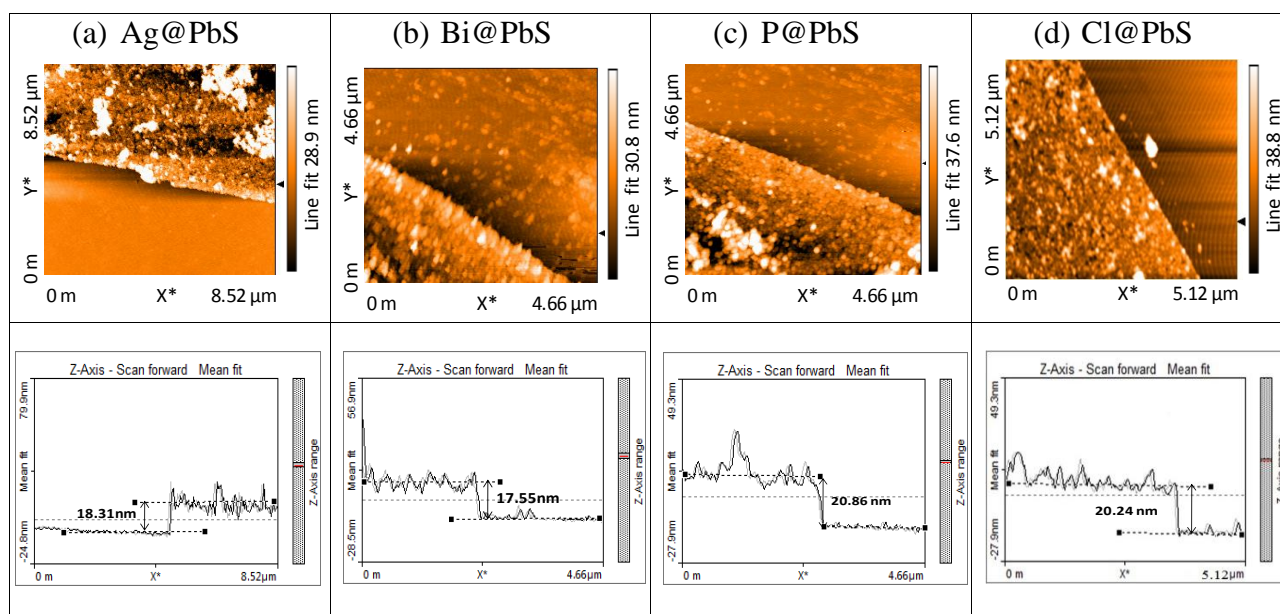

**Fig. S1** AFM images of scratched SILAR films (10 layers each) along with the depth profile of the scratch.

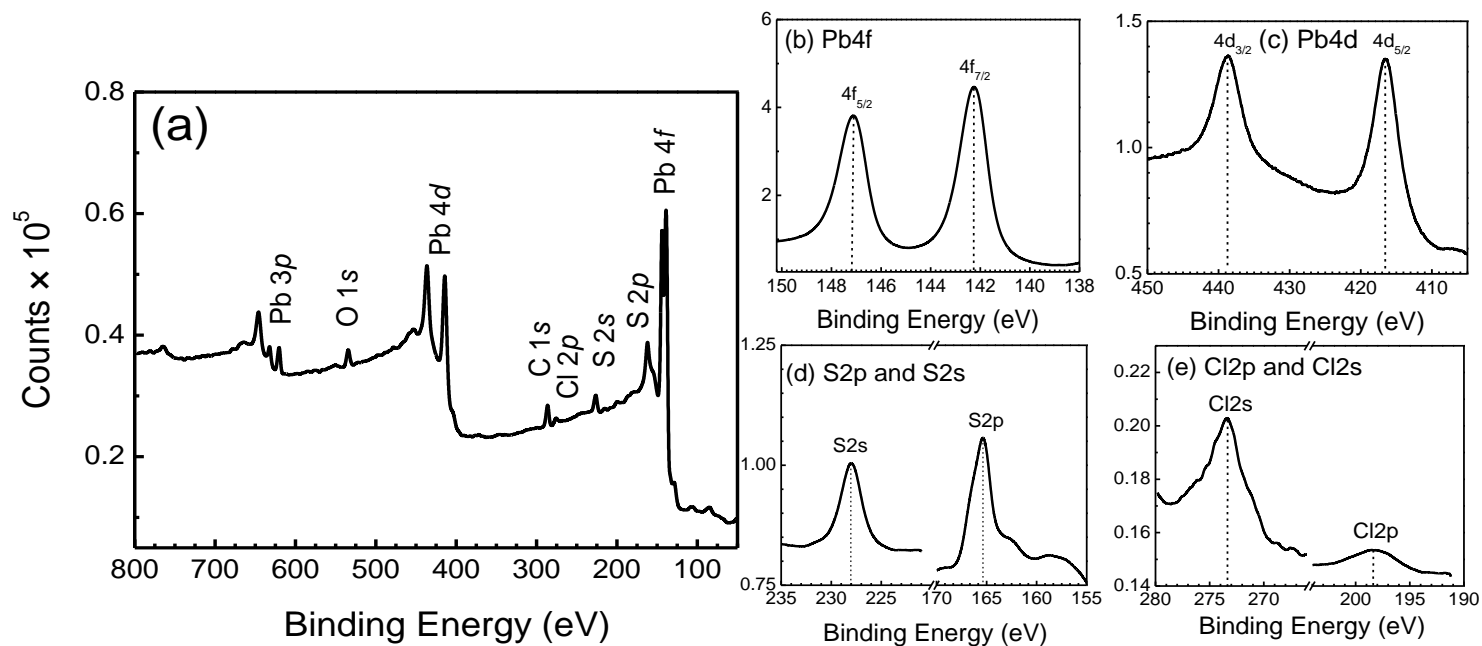

**Fig. S2** (a) Full-range XPS spectrum of Cl@PbS. High-resolution spectra of the material resolving binding energies of Pb4f, Pb4d, S2p and S2s and Cl2p and Cl2s electrons are shown in (b) through (e), in sequence.

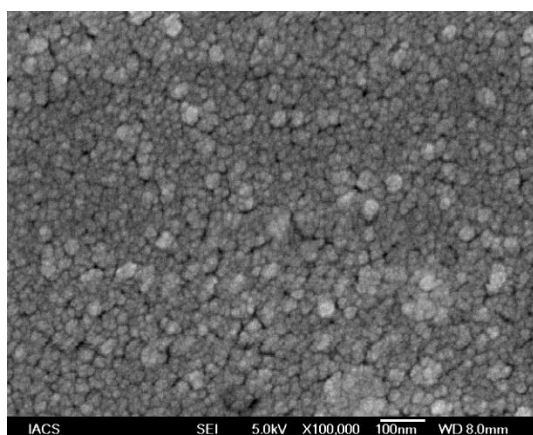

**Fig. S3** SEM image of a pristine PbS thin film.

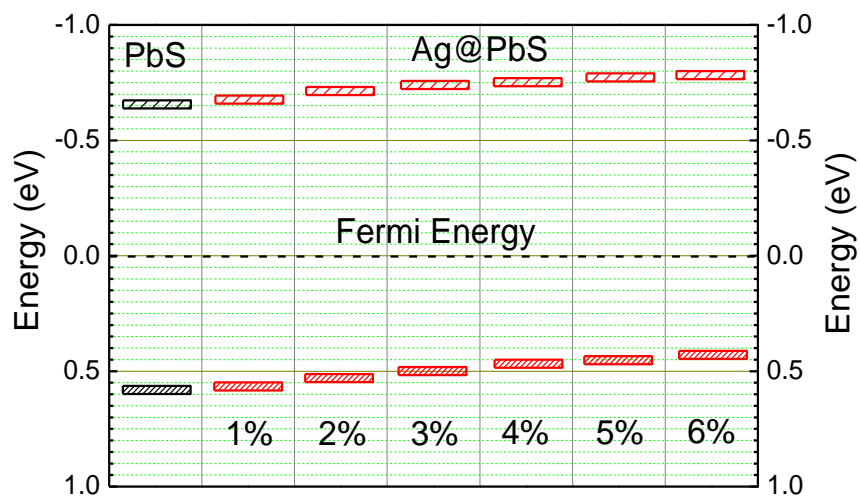

**Fig. S4** Schematic band diagram of Ag@PbS having a dopant content of 1-6 atomic% with respect to lead. The atomic% of silver is shown as legends. Band positions of pristine PbS are also presented in the figure. The dashed line represents each semiconductor's Fermi energy, which was aligned to 0 V.

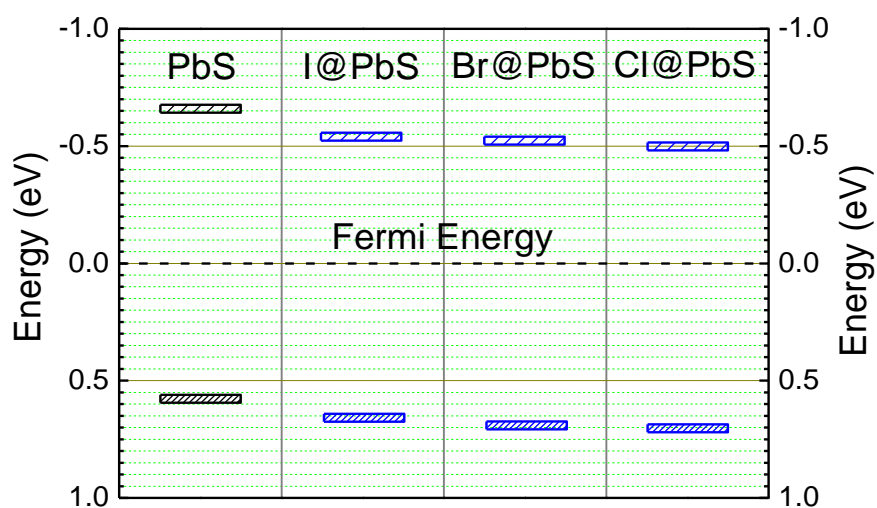

**Fig. S5** Schematic band diagram of halide-doped PbS thin-films. Band positions of pristine PbS are also shown in the figure. The dashed line represents each semiconductor's Fermi energy, which was aligned to 0 V.
